# Supplementary material for: The association between psychosocial factors and change in lifestyle behaviour following lifestyle advice and information about cardiovascular disease risk
Source: Springer Nature journal article supplement (doi:10.1186/s12889-018-5655-7), 2018-06-13
Supplement: MOESM1 [file 15843142]

**Table S1: Baseline demographics and psychosocial factors of participants in the INFORM trial, by those with missing data for objective outcomes at baseline or follow-up.**

|                                             | Objective physical activity |                        |         |                        |         | Objective fruit and vegetable intake |                        |         |                        |         |
|---------------------------------------------|-----------------------------|------------------------|---------|------------------------|---------|--------------------------------------|------------------------|---------|------------------------|---------|
|                                             | Non-missing                 |                        | Missing |                        | P value | Non-missing                          |                        | Missing |                        | P value |
|                                             | N                           | n (%) or mean $\pm$ SD | N       | n (%) or mean $\pm$ SD |         | N                                    | n (%) or mean $\pm$ SD | N       | n (%) or mean $\pm$ SD |         |
| <b>Demographics</b>                         |                             |                        |         |                        |         |                                      |                        |         |                        |         |
| Sex (male)                                  | 604                         | 332 (55.0)             | 112     | 67 (59.8)              | 0.343   | 574                                  | 315 (54.9)             | 142     | 84 (59.2)              | 0.359   |
| Age (years)                                 | 604                         | 56.8 $\pm$ 8.9         | 112     | 56.6 $\pm$ 8.7         | 0.817   | 574                                  | 57.1 $\pm$ 8.73        | 142     | 55.4 $\pm$ 9.15        | 0.045   |
| Education (university)                      | 604                         | 338 (56.0)             | 112     | 70 (62.5)              | 0.200   | 574                                  | 329 (57.3)             | 142     | 79 (55.6)              | 0.717   |
| Income (less than £40 000 per year)         | 552                         | 352 (63.8)             | 101     | 57 (65.4)              | 0.162   | 525                                  | 333 (63.4)             | 128     | 76 (59.4)              | 0.396   |
| Married or living as married                | 604                         | 453 (75.0)             | 112     | 77 (68.8)              | 0.166   | 574                                  | 432 (75.3)             | 142     | 98 (69.0)              | 0.129   |
| Ethnicity (White – British, Irish or other) | 541                         | 531 (98.2)             | 102     | 99 (97.1)              | 0.472   | 512                                  | 503 (98.2)             | 131     | 127 (97.0)             | 0.348   |
| Randomisation group                         | 604                         |                        | 112     |                        |         | 574                                  |                        | 142     |                        |         |
| (1) Lifestyle advice                        |                             | 200 (33.1)             |         | 39 (34.8)              | 0.787   |                                      | 196 (34.2)             |         | 43 (30.3)              | 0.242   |
| (2) Lifestyle + phenotype                   |                             | 207 (34.3)             |         | 32 (28.6)              |         |                                      | 193 (33.6)             |         | 46 (32.4)              |         |
| (3) Lifestyle + phenotype + genotype        |                             | 197 (32.6)             |         | 41 (36.6)              |         |                                      | 185 (32.2)             |         | 53 (37.3)              |         |
| Occupation category                         | 604                         |                        | 112     |                        |         | 574                                  |                        | 142     |                        |         |
| Sedentary                                   |                             | 306 (50.7)             |         | 64 (57.1)              | 0.246   |                                      | 290 (50.5)             |         | 80 (56.3)              | 0.146   |
| Do not work at present                      |                             | 179 (29.6)             |         | 29 (25.9)              |         |                                      | 174 (30.3)             |         | 34 (23.9)              |         |
| <b>Social support</b>                       |                             |                        |         |                        |         |                                      |                        |         |                        |         |
| Overall                                     | 588                         | 5.63 $\pm$ 1.12        | 105     | 5.48 $\pm$ 1.18        | 0.184   | 562                                  | 5.64 $\pm$ 1.13        | 131     | 5.48 $\pm$ 1.14        | 0.109   |
| Family                                      | 591                         | 5.57 $\pm$ 1.33        | 105     | 5.44 $\pm$ 1.41        | 0.392   | 564                                  | 5.57 $\pm$ 1.36        | 132     | 5.44 $\pm$ 1.29        | 0.128   |
| Friends                                     | 592                         | 5.46 $\pm$ 1.27        | 105     | 5.39 $\pm$ 1.29        | 0.480   | 564                                  | 5.47 $\pm$ 1.26        | 133     | 5.34 $\pm$ 1.32        | 0.294   |
| Significant other                           | 589                         | 5.86 $\pm$ 1.47        | 105     | 5.60 $\pm$ 1.46        | 0.037   | 562                                  | 5.87 $\pm$ 1.47        | 132     | 5.64 $\pm$ 1.45        | 0.011   |
| <b>Stress level</b>                         |                             |                        |         |                        |         |                                      |                        |         |                        |         |
| Overall                                     | 599                         |                        | 111     |                        |         | 570                                  |                        | 140     |                        |         |
| Low                                         |                             | 258 (43.1)             |         | 38 (34.2)              | 0.225   |                                      | 249 (43.7)             |         | 47 (33.6)              | 0.070   |
| Moderate                                    |                             | 260 (43.4)             |         | 60 (54.1)              |         |                                      | 246 (43.2)             |         | 74 (52.9)              |         |
| High                                        |                             | 81 (13.5)              |         | 13 (11.7)              |         |                                      | 75 (13.2)              |         | 19 (13.6)              |         |
| <b>Mood</b>                                 |                             |                        |         |                        |         |                                      |                        |         |                        |         |
| Feeling down                                | 598                         | 113 (18.9)             | 112     | 20 (17.9)              | 0.796   | 569                                  | 109 (19.2)             | 141     | 24 (17.0)              | 0.561   |
| Anhedonia                                   | 597                         | 88 (14.7)              | 110     | 13 (11.8)              | 0.421   | 567                                  | 75 (13.2)              | 140     | 26 (18.6)              | 0.106   |

Number and percentage of participants are presented for categorical variables; mean and standard deviation are presented for continuous variables.

**N/n** number of participants; **SD** standard deviation

**Randomisation groups (1)** lifestyle advice only; **(2)** lifestyle advice plus phenotypic CHD risk score information; **(3)** lifestyle advice plus phenotypic and genetic CHD risk score information

‘Feeling down’ refers to the question “During the past month, have you often been bothered by feeling down, depressed, or hopeless?” ‘Anhedonia’ refers to the question “During the past month, have you often been bothered by having little interest or pleasure in doing things?”

Additional File 1

**Supplementary Table 2: The association between psychosocial factors and change in physical activity outcomes for the total population and stratified by sex (sensitivity analysis).**

|                                  | All        |                        |         |          |                        |         | Male       |                        |         |          |                        |         | Female     |                        |         |          |                       |         |
|----------------------------------|------------|------------------------|---------|----------|------------------------|---------|------------|------------------------|---------|----------|------------------------|---------|------------|------------------------|---------|----------|-----------------------|---------|
|                                  | Unadjusted |                        |         | Adjusted |                        |         | Unadjusted |                        |         | Adjusted |                        |         | Unadjusted |                        |         | Adjusted |                       |         |
|                                  | N          | β (95% CI)             | P value | N        | β (95% CI)             | P value | N          | β (95% CI)             | P value | N        | β (95% CI)             | P value | N          | β (95% CI)             | P value | N        | β (95% CI)            | P value |
| <b>Social support</b>            |            |                        |         |          |                        |         |            |                        |         |          |                        |         |            |                        |         |          |                       |         |
| <b>Objective</b>                 |            |                        |         |          |                        |         |            |                        |         |          |                        |         |            |                        |         |          |                       |         |
| Acceleration (mg/min)            | 588        | -0.24 (-0.52 to 0.05)  | 0.100   | 538      | -0.21 (-0.53 to 0.12)  | 0.214   | 323        | -0.29 (-0.68 to 0.10)  | 0.150   | 302      | -0.25 (-0.71 to 0.21)  | 0.288   | 265        | -0.19 (-0.60 to 0.23)  | 0.382   | 236      | -0.14 (-0.62 to 0.33) | 0.548   |
| <b>Self-report</b>               |            |                        |         |          |                        |         |            |                        |         |          |                        |         |            |                        |         |          |                       |         |
| Total physical activity (h/w)    | 608        | 0.07 (-0.52 to 0.65)   | 0.827   | 560      | 0.24 (-0.39 to 0.87)   | 0.458   | 333        | -0.29 (-1.07 to 0.50)  | 0.472   | 314      | 0.49 (-0.39 to 1.38)   | 0.274   | 275        | 0.40 (-0.50 to 1.30)   | 0.382   | 246      | 0.38 (-0.55 to 1.32)  | 0.421   |
| Vigorous physical activity (h/w) | 690        | -0.05 (-0.46 to 0.35)  | 0.791   | 631      | 0.17 (-0.28 to 0.62)   | 0.468   | 386        | 0.09 (-0.48 to 0.65)   | 0.767   | 361      | 0.46 (-0.20 to 1.11)   | 0.172   | 304        | -0.30 (-0.88 to 0.28)  | 0.304   | 270      | -0.03 (-0.65 to 0.59) | 0.928   |
| <b>Stress</b>                    |            |                        |         |          |                        |         |            |                        |         |          |                        |         |            |                        |         |          |                       |         |
| <b>Objective</b>                 |            |                        |         |          |                        |         |            |                        |         |          |                        |         |            |                        |         |          |                       |         |
| Acceleration (mg/min)            | 599        | 0.19 (-0.16 to 0.54)   | 0.297   | 547      | 0.22 (-0.19 to 0.63)   | 0.291   | 331        | 0.21 (-0.26 to 0.68)   | 0.377   | 309      | 0.28 (-0.27 to 0.82)   | 0.316   | 268        | 0.15 (-0.39 to 0.69)   | 0.587   | 238      | 0.12 (-0.51 to 0.76)  | 0.699   |
| <b>Self-report</b>               |            |                        |         |          |                        |         |            |                        |         |          |                        |         |            |                        |         |          |                       |         |
| Total physical activity (h/w)    | 619        | -1.27 (-1.99 to -0.55) | 0.001   | 569      | -0.88 (-1.67 to -0.10) | 0.027   | 340        | -1.19 (-2.10 to -0.28) | 0.010   | 320      | -0.88 (-1.86 to 0.10)  | 0.078   | 279        | -1.44 (-2.61 to -0.27) | 0.016   | 249      | -0.84 (-2.12 to 0.44) | 0.197   |
| Vigorous physical activity (h/w) | 707        | -0.86 (-1.37 to -0.35) | 0.001   | 645      | -0.82 (-1.39 to -0.25) | 0.005   | 396        | -1.19 (-1.88 to -0.51) | 0.001   | 369      | -1.23 (-1.99 to -0.46) | 0.002   | 311        | -0.40 (-1.16 to 0.36)  | 0.305   | 276      | -0.27 (-1.11 to 0.58) | 0.533   |
| <b>Mood (feeling down)</b>       |            |                        |         |          |                        |         |            |                        |         |          |                        |         |            |                        |         |          |                       |         |
| <b>Objective</b>                 |            |                        |         |          |                        |         |            |                        |         |          |                        |         |            |                        |         |          |                       |         |
| Acceleration (mg/min)            | 598        | -0.29 (-1.09 to 0.52)  | 0.484   | 546      | -0.29 (-1.16 to 0.57)  | 0.507   | 329        | 0.12 (-1.03 to 1.28)   | 0.832   | 307      | 0.06 (-1.15 to 1.28)   | 0.919   | 269        | -0.76 (-1.88 to 0.36)  | 0.184   | 239      | -0.78 (-2.03 to 0.48) | 0.222   |
| <b>Self-report</b>               |            |                        |         |          |                        |         |            |                        |         |          |                        |         |            |                        |         |          |                       |         |
| Total physical activity (h/w)    | 618        | -1.69 (-3.34 to -0.04) | 0.044   | 568      | -0.90 (-2.58 to 0.78)  | 0.293   | 338        | -1.15 (-3.32 to 1.03)  | 0.301   | 318      | -0.61 (-2.81 to 1.58)  | 0.582   | 280        | -2.36 (-4.89 to 0.17)  | 0.067   | 250      | -1.39 (-4.02 to 1.24) | 0.298   |
| Vigorous physical activity (h/w) | 707        | -0.80 (-1.96 to 0.37)  | 0.179   | 645      | -0.45 (-1.66 to 0.76)  | 0.465   | 394        | -0.93 (-2.59 to 0.72)  | 0.268   | 367      | -0.30 (-2.02 to 1.42)  | 0.734   | 313        | -0.72 (-2.33 to 0.90)  | 0.383   | 278      | -0.64 (-2.34 to 1.06) | 0.459   |
| <b>Mood (anhedonia)</b>          |            |                        |         |          |                        |         |            |                        |         |          |                        |         |            |                        |         |          |                       |         |
| <b>Objective</b>                 |            |                        |         |          |                        |         |            |                        |         |          |                        |         |            |                        |         |          |                       |         |
| Acceleration (mg/min)            | 597        | 0.81 (-0.07 to 1.68)   | 0.071   | 545      | 1.01 (0.07 to 1.96)    | 0.035   | 329        | 1.01 (-0.12 to 2.14)   | 0.079   | 307      | 1.12 (-0.08 to 2.31)   | 0.066   | 268        | 0.51 (-0.92 to 1.93)   | 0.484   | 238      | 0.42 (-1.16 to 2.00)  | 0.601   |
| <b>Self-report</b>               |            |                        |         |          |                        |         |            |                        |         |          |                        |         |            |                        |         |          |                       |         |
| Total physical activity (h/w)    | 618        | -1.58 (-3.44 to 0.28)  | 0.095   | 568      | -0.88 (-2.78 to 1.01)  | 0.361   | 338        | -1.14 (-3.36 to 1.08)  | 0.313   | 318      | -0.90 (-3.18 to 1.38)  | 0.439   | 280        | -2.11 (-5.40 to 1.19)  | 0.209   | 250      | -1.90 (-5.27 to 1.47) | 0.268   |
| Vigorous physical activity (h/w) | 704        | -1.31 (-2.60 to -0.02) | 0.046   | 643      | -0.93 (-2.27 to 0.42)  | 0.177   | 394        | -1.09 (-2.78 to 0.60)  | 0.206   | 367      | -0.75 (-2.52 to 1.01)  | 0.402   | 310        | -1.66 (-3.70 to 0.39)  | 0.112   | 276      | -1.86 (-3.97 to 0.26) | 0.085   |

Assessed by multiple linear regression, reporting beta coefficients. Vigorous physical activity includes walking, cycling and sport. Sensitivity analysis: data below 5<sup>th</sup>/above 95<sup>th</sup> percentiles replaced with the values of the 5<sup>th</sup>/95<sup>th</sup> percentiles, respectively. All models are adjusted for baseline PA; the adjusted model is also adjusted for age, sex, randomisation group, marital status, income level, education level and occupation type.

**95% CI** 95% confidence interval; **h/w** hours per week; **N/n** number of participants

**Table S3: The association between psychosocial factors and change in fruit and vegetable intake outcomes for the total population and stratified by sex (sensitivity analysis).**

|                            | All        |                       |         |          |                       |         | Males      |                        |         |          |                        |         | Females    |                       |         |          |                       |         |
|----------------------------|------------|-----------------------|---------|----------|-----------------------|---------|------------|------------------------|---------|----------|------------------------|---------|------------|-----------------------|---------|----------|-----------------------|---------|
|                            | Unadjusted |                       |         | Adjusted |                       |         | Unadjusted |                        |         | Adjusted |                        |         | Unadjusted |                       |         | Adjusted |                       |         |
|                            | N          | β/OR (95% CI)         | P value | N        | β/OR (95% CI)         | P value | N          | β/OR (95% CI)          | P value | N        | β/OR (95% CI)          | P value | N          | β/OR (95% CI)         | P value | N        | β/OR (95% CI)         | P value |
| <b>Social support</b>      |            |                       |         |          |                       |         |            |                        |         |          |                        |         |            |                       |         |          |                       |         |
| <b>Objective</b>           |            |                       |         |          |                       |         |            |                        |         |          |                        |         |            |                       |         |          |                       |         |
| Total carotenoids (μmol/l) | 562        | -0.02 (-0.07 to 0.03) | 0.481   | 515      | -0.03 (-0.09 to 0.03) | 0.289   | 311        | -0.00 (-0.07 to 0.06)  | 0.925   | 293      | -0.02 (-0.09 to 0.06)  | 0.659   | 251        | -0.03 (-0.11 to 0.06) | 0.493   | 222      | -0.04 (-0.13 to 0.06) | 0.447   |
| <b>Self-report</b>         |            |                       |         |          |                       |         |            |                        |         |          |                        |         |            |                       |         |          |                       |         |
| Increase to 5 A Day        | 419        | 1.39 (1.12 to 1.72)   | 0.002   | 391      | 1.33 (1.05 to 1.69)   | 0.020   | 246        | 1.27 (0.96 to 1.68)    | 0.097   | 229      | 1.19 (0.85 to 1.66)    | 0.303   | 173        | 1.56 (1.12 to 2.18)   | 0.009   | 157      | 1.68 (1.12 to 2.53)   | 0.012   |
| <b>Stress</b>              |            |                       |         |          |                       |         |            |                        |         |          |                        |         |            |                       |         |          |                       |         |
| <b>Objective</b>           |            |                       |         |          |                       |         |            |                        |         |          |                        |         |            |                       |         |          |                       |         |
| Total carotenoids (μmol/l) | 570        | 0.01 (-0.05 to 0.07)  | 0.728   | 521      | 0.01 (-0.06 to 0.08)  | 0.805   | 315        | -0.00 (-0.07 to 0.07)  | 0.969   | 296      | -0.02 (-0.11 to 0.06)  | 0.602   | 255        | 0.03 (-0.08 to 0.14)  | 0.634   | 225      | 0.04 (-0.09 to 0.17)  | 0.539   |
| <b>Self-report</b>         |            |                       |         |          |                       |         |            |                        |         |          |                        |         |            |                       |         |          |                       |         |
| Increase to 5 A Day        | 428        | 0.55 (0.43 to 0.71)   | <0.001  | 399      | 0.57 (0.43 to 0.76)   | <0.001  | 251        | 0.66 (0.49 to 0.89)    | 0.006   | 234      | 0.67 (0.47 to 0.96)    | 0.028   | 177        | 0.38 (0.24 to 0.59)   | <0.001  | 160      | 0.35 (0.20 to 0.62)   | <0.001  |
| <b>Mood (feeling down)</b> |            |                       |         |          |                       |         |            |                        |         |          |                        |         |            |                       |         |          |                       |         |
| <b>Objective</b>           |            |                       |         |          |                       |         |            |                        |         |          |                        |         |            |                       |         |          |                       |         |
| Total carotenoids (μmol/l) | 569        | -0.04 (-0.19 to 0.11) | 0.592   | 520      | -0.04 (-0.20 to 0.11) | 0.586   | 313        | -0.11 (-0.29 to 0.07)  | 0.234   | 294      | -0.14 (-0.33 to 0.05)  | 0.157   | 256        | 0.02 (-0.22 to 0.26)  | 0.870   | 226      | 0.03 (-0.23 to 0.30)  | 0.796   |
| <b>Self-report</b>         |            |                       |         |          |                       |         |            |                        |         |          |                        |         |            |                       |         |          |                       |         |
| Increase to 5 A Day        | 427        | 0.56 (0.32 to 0.99)   | 0.045   | 398      | 0.70 (0.38 to 1.28)   | 0.246   | 250        | 0.70 (0.33 to 1.52)    | 0.369   | 233      | 0.84 (0.37 to 1.93)    | 0.683   | 177        | 0.42 (0.18 to 0.97)   | 0.043   | 160      | 0.55 (0.22 to 1.39)   | 0.208   |
| <b>Mood (anhedonia)</b>    |            |                       |         |          |                       |         |            |                        |         |          |                        |         |            |                       |         |          |                       |         |
| <b>Objective</b>           |            |                       |         |          |                       |         |            |                        |         |          |                        |         |            |                       |         |          |                       |         |
| Total carotenoids (μmol/l) | 567        | -0.12 (-0.29 to 0.05) | 0.173   | 519      | -0.15 (-0.33 to 0.03) | 0.109   | 314        | -0.20 (-0.39 to -0.00) | 0.046   | 295      | -0.26 (-0.46 to -0.06) | 0.013   | 253        | -0.01 (-0.31 to 0.30) | 0.958   | 224      | -0.04 (-0.37 to 0.29) | 0.803   |
| <b>Self-report</b>         |            |                       |         |          |                       |         |            |                        |         |          |                        |         |            |                       |         |          |                       |         |
| Increase to 5 A Day        | 427        | 0.44 (0.23 to 0.85)   | 0.014   | 398      | 0.55 (0.28 to 1.11)   | 0.095   | 249        | 0.54 (0.25 to 1.19)    | 0.125   | 232      | 0.68 (0.28 to 1.61)    | 0.375   | 178        | 0.29 (0.08 to 1.02)   | 0.054   | 161      | 0.31 (0.08 to 1.14)   | 0.078   |

Assessed by multiple linear regression, reporting beta coefficients for objective outcomes; or logistic regression, reporting odds ratios for self-reported outcomes. Sensitivity analysis: data below 5<sup>th</sup>/above 95<sup>th</sup> percentiles replaced with the values of the 5<sup>th</sup>/95<sup>th</sup> percentiles, respectively, for continuous outcomes. The linear regression model is adjusted for baseline carotenoid level; adjusted models are also for age, sex, randomisation group, marital status, income level, education level and occupation type.

**95% CI** 95% confidence interval; **OR** odds ratio; **N/n** number of participants
